# Supplementary material for: Judging Others by Your Own Standards: Attractiveness of Primate Faces as Seen by Human Respondents
Source: Front Psychol. 2018 Dec 11;9:2439. doi: 10.3389/fpsyg.2018.02439 (PMC6297365; doi:10.3389/fpsyg.2018.02439)
Supplement: Supplementary file 1 [file Table_1.XLS]

## Sheet: Primate list
Appendix 1. The list of species included in the study, supplemented with the attractiveness ratings and the photo sources. Species marked with * were used as controls and removed from the main analyses. The naming of the species follows Mittermeier, Rylands, & Wilson (2013), except for Tarsius syrichta (Shekelle & Arboleda, 2008) and Semnopithecus dussumieri (Groves & Chhangani, 2008).
Genus	Species	English name	Attractiveness ratings	Author of the photo	Source
Allenopithecus	nigroviridis	Allen's Swamp Monkey	3.97241	Doug	http://www.flickr.com/photos/photosbydoug/333617195/
Allocebus	trichotis	Hairy-eared Dwarf Lemur	3.25172	E. E. Louis Jr.	Mittermeier, R.A.; Louis, E.E.; Richardson, M.; Schwitzer, C.; Langrand, O.; Rylands, A.B.; Hawkins, F.; Rajaobelina, S.; Ratsimbazafy, J.; Rasoloarison, R.; Roos, Ch.; Kappeler, P.M. & Mackinnon, J. (2010). Lemurs of Madagascar. Illustrated by S.D. Nash (3rd ed.). Conservation International. ISBN 978-1-934151-23-5.
Alouatta	seniculus	Colombian Red Howler	3.7931	Joachim S. Müller	http://www.flickr.com/photos/joachim_s_mueller/4042182528/
Aotus	lemurinus	Lemurine Night Monkey	3.65862	Lazette Gifford	http://www.flickr.com/photos/zettepics/4542642406/
Arctocebus	calabarensis	Calabar Angwantibo	3.15172	Noel Rowe	Rowe, N. 1996: The Pictorial Guide to the Living Primates. Pogonias Press, East Hampton, NY. 263 pp.
Ateles	geoffroyi	Central American Spider Monkey	3.47586	B Mlry	http://www.flickr.com/photos/epmallory3/5375641830/
Avahi	laniger	Eastern Woolly Lemur	3.57931	R. A. Mittermeier	Mittermeier, R.A.; Louis, E.E.; Richardson, M.; Schwitzer, C.; Langrand, O.; Rylands, A.B.; Hawkins, F.; Rajaobelina, S.; Ratsimbazafy, J.; Rasoloarison, R.; Roos, Ch.; Kappeler, P.M. & Mackinnon, J. (2010). Lemurs of Madagascar. Illustrated by S.D. Nash (3rd ed.). Conservation International. ISBN 978-1-934151-23-5.
Avahi	occidentalis	Western Woolly Lemur	3.56552	Diana Bradshaw	http://www.flickr.com/photos/pix-diana/3887861802/
Avahi	occidentalis*	Western Woolly Lemur	3.6	unknown	Mittermeier, R.A.; Louis, E.E.; Richardson, M.; Schwitzer, C.; Langrand, O.; Rylands, A.B.; Hawkins, F.; Rajaobelina, S.; Ratsimbazafy, J.; Rasoloarison, R.; Roos, Ch.; Kappeler, P.M. & Mackinnon, J. (2010). Lemurs of Madagascar. Illustrated by S.D. Nash (3rd ed.). Conservation International. ISBN 978-1-934151-23-5.
Brachyteles	hypoxanthus	Northern Muriqui	3.99655	Peter Schoen	http://www.flickr.com/photos/peterschoen/5411041632/ http://www.flickr.com/photos/peterschoen/5491386806/
Cacajao	calvus	Bald Uacari	5.57931	Ric	http://www.flickr.com/photos/16898659@N07/2315166960/
Cacajao	melanocephalus	Black-headed Uacari	4.53103	Noel Rowe	Rowe, N. 1996: The Pictorial Guide to the Living Primates. Pogonias Press, East Hampton, NY. 263 pp.
Callicebus	cupreus	Coppery Titi	3.54828	Chi-Kwong	http://www.flickr.com/photos/8050481@N02/3051448352/
Callimico	goeldii	Goeldi's monkey	2.75862	Cam McMahon	http://commons.wikimedia.org/wiki/File:Goeldi%27s_Marmoset.jpg
Mico	argentatus	Silvery Marmoset	5.05517	Postdlf	http://commons.wikimedia.org/wiki/File:Callithrix_argentata_at_the_Bronx_Zoo_01.jpg
Callithrix	aurita	Buffy-tufted-ear Marmoset	3.18621	Julian_SB	http://www.flickr.com/photos/juliansb/5312271219/
Cebuella	pygmaea	Pygmy Marmoset	4.3	Veronika Holáňová	not online, but see Figure 1
Cebuella	pygmaea*	Pygmy Marmoset	4.02414	Veronika Holáňová	not online
Sapajus	apella	Guianan Brown Capuchin	5.1069	Jérôme Micheletta	not online
Cebus	capucinus	Colombian White-faced Capuchin	3.33103	Jérôme Micheletta	not online
Cercocebus	chrysogaster	Golden-bellied Mangabey	3.43448	Matthew Ross	http://www.flickr.com/photos/mattodono/3262312860/in/photostream/
Cercocebus	torquatus	Rwd-capped Mangabey	3.9069	Sebastian Niedlich	http://www.flickr.com/photos/42311564@N00/2669235480/
Cercopithecus	diana	Diana Monkey	3.58966	Daniel Heuclin	http://cdn1.arkive.org/media/42/42432131-D68A-450D-9126-4E038B7EC360/Presentation.Large/Close-up-of-a-Diana-guenon-.jpg
Cercopithecus	hamlyni	Owl-faced Monkey	4.77586	Noel Rowe	Rowe, N. 1996: The Pictorial Guide to the Living Primates. Pogonias Press, East Hampton, NY. 263 pp.
Cercopithecus	mitis	Blue Monkey	4.16897	Lynn Bashaw	http://www.flickr.com/photos/30743089@N05/6315640690/
Cercopithecus	neglectus	De Brazza's Monkey	3.6931	suneko	http://commons.wikimedia.org/wiki/File:De_Brazza%27s_Monkey.jpg
Cercopithecus	nictitans	Putty-nosed Monkey	4.03793	Laura Bertola	http://www.flickr.com/photos/laurabertola/3934230445/in/photostream/
Cercopithecus	petaurista	Spot-nosed Monkey	4.34828	Robert Miller	http://www.flickr.com/photos/robertmiller/343455856/
Cercopithecus	pogonias	Crowned Monkey	4.04138	Connie Lemperle	http://www.flickr.com/photos/lemperleconnie/4777479007/
Cercopithecus	wolfi	Wolf's Monkey	3.9069	Adam Fink	http://www.flickr.com/photos/adamcfink/6048773706/
Cheirogaleus	medius	Fat-tailed Dwarf Lemur	3.44483	R. A. Mittermeier	Mittermeier, R.A.; Louis, E.E.; Richardson, M.; Schwitzer, C.; Langrand, O.; Rylands, A.B.; Hawkins, F.; Rajaobelina, S.; Ratsimbazafy, J.; Rasoloarison, R.; Roos, Ch.; Kappeler, P.M. & Mackinnon, J. (2010). Lemurs of Madagascar. Illustrated by S.D. Nash (3rd ed.). Conservation International. ISBN 978-1-934151-23-5.
Chiropotes	chiropotes	Rio Negro Bearded Saki	5.25862	Susie Hewitt	http://www.flickr.com/photos/s-hewitt/5617716172/
Chlorocebus	aethiops	Grivet Monkey	3.44483	Mario Lanini	http://www.flickr.com/photos/brontolo59/4571737828/
Colobus	angolensis	Angolan Colobus	3.27931	Matthew Ross	http://www.flickr.com/photos/mattodono/3262312354/
Colobus	angolensis*	Angolan Colobus	3.4931	Lynn Bashaw	http://www.flickr.com/photos/30743089@N05/6315669552/in/photostream/
Colobus	guereza	Guereza	4.69655	Steve Garvie	http://www.flickr.com/photos/rainbirder/6261325607/in/photostream/
Daubentonia	madagascariensis	Aye-aye	4.50345	E. E. Louis Jr.	Mittermeier, R.A.; Louis, E.E.; Richardson, M.; Schwitzer, C.; Langrand, O.; Rylands, A.B.; Hawkins, F.; Rajaobelina, S.; Ratsimbazafy, J.; Rasoloarison, R.; Roos, Ch.; Kappeler, P.M. & Mackinnon, J. (2010). Lemurs of Madagascar. Illustrated by S.D. Nash (3rd ed.). Conservation International. ISBN 978-1-934151-23-5.
Erythrocebus	patas	Patas Monkey	4.04828	Cyndi Anderson	http://www.flickr.com/photos/17014078@N08/3165593758/
Eulemur	albifrons	White-fronted Brown Lemur	3.63103	Silvie Lišková	not online
Eulemur	coronatus	Crowned Lemur	3.62069	E01	http://www.flickr.com/photos/e01/3911512179/
Eulemur	macaco	Black Lemur	2.90345	Silvie Lišková	not online, but see Figure 1
Eulemur	macaco*	Black Lemur	3.18276	Dean Thorpe	http://www.flickr.com/photos/aspexdesign/5856332475/
Eulemur	rubriventer	Red-bellied Lemur	2.88276	Paul Albertella	http://www.flickr.com/photos/paulspace/4765083061/
Euoticus	elegantulus	Southern Needle-clawed Galago	4.71379	CNRS Ecotrop - A.R. Devez	Rowe, N. 1996: The Pictorial Guide to the Living Primates. Pogonias Press, East Hampton, NY. 263 pp.
Galago	moholi	Southern Lesser Galago	2.74828	Noel Rowe	Rowe, N. 1996: The Pictorial Guide to the Living Primates. Pogonias Press, East Hampton, NY. 263 pp.
Galagoides	demidovii	Demidoff's Dwarf Galago	3.95862	R. Austing	Rowe, N. 1996: The Pictorial Guide to the Living Primates. Pogonias Press, East Hampton, NY. 263 pp.
Gorilla	beringei	Eastern Gorilla	3.58966	Alan Hill	http://www.flickr.com/photos/alanhill/1952869213/in/photostream
Gorilla	gorilla	Western Gorilla	3.15517	Neier	http://en.wikipedia.org/wiki/File:UenoGorilla.jpg
Hapalemur	griseus	Gray Bamboo Lemur	3.44828	Alan Hill	http://www.flickr.com/photos/alanhill/1571968201/in/photostream/
Hoolock	hoolock	Western Hoolock Gibbon	3.37586	Sirajul Hossain	https://www.facebook.com/photo.php?fbid=225839159831&set=a.225059524831.175119.709629831&type=3&theater
Hylobates	agilis	Agile Gibbon	2.82069	Julielangford	http://commons.wikimedia.org/wiki/File:Agilegibbon.jpg
Hylobates	lar	Lar Gibbon	3.21724	Arjan Haverkamp	http://www.flickr.com/photos/ajhaverkamp/810679414/
Indri	indri	Indri	2.96552	Jon Irvine	http://www.flickr.com/photos/calidris-photos/6541521193/
Lagothrix	lagotricha	Humboldt's Woolly Monkey	5.27586	Hans Hillewaert	http://commons.wikimedia.org/wiki/File:Lagothrix_lagotricha_%28male%29.jpg
Lemur	catta	Ring-tailed Lemur	2.66207	Alan Hill	http://www.flickr.com/photos/alanhill/2378360930/in/photostream/
Leontopithecus	chrysomelas	Golden-headed Lion Tamarin	3.61379	Ruben Undheim	http://www.flickr.com/photos/rubund/6337871306/
Leontopithecus	rosalia	Golden Lion Tamarin	3.08966	su neko	http://commons.wikimedia.org/wiki/File:Golden_Lion_Tamarin_Leontopithecus_rosalia.jpg
Lepilemur	ankaranensis	Ankarana Sportive Lemur	3.41379	Niall Corbet	http://www.flickr.com/photos/niallcorbet/5393174133/
Lepilemur	grewcockorum	Anjiamangirana Sportive Lemur	3.03103	E. E. Louis Jr.	Mittermeier, R.A.; Louis, E.E.; Richardson, M.; Schwitzer, C.; Langrand, O.; Rylands, A.B.; Hawkins, F.; Rajaobelina, S.; Ratsimbazafy, J.; Rasoloarison, R.; Roos, Ch.; Kappeler, P.M. & Mackinnon, J. (2010). Lemurs of Madagascar. Illustrated by S.D. Nash (3rd ed.). Conservation International. ISBN 978-1-934151-23-5.
Lepilemur	petteri	Petter's Sportive Lemur	3.03793	unknown	Mittermeier, R.A.; Louis, E.E.; Richardson, M.; Schwitzer, C.; Langrand, O.; Rylands, A.B.; Hawkins, F.; Rajaobelina, S.; Ratsimbazafy, J.; Rasoloarison, R.; Roos, Ch.; Kappeler, P.M. & Mackinnon, J. (2010). Lemurs of Madagascar. Illustrated by S.D. Nash (3rd ed.). Conservation International. ISBN 978-1-934151-23-5.
Lophocebus	aterrimus	Northern Black Crested Mangabey	3.66897	Patricia van Casteren	http://www.flickr.com/photos/patries71/3091735547/
Loris	tardigradus	Red Slender Loris	4.12069	Milan Kaftan	not online, but see Figure 1
Macaca	fascicularis	Long-tailed Macaque	3.64483	Arjan Haverkamp	http://www.flickr.com/photos/ajhaverkamp/810700132/
Macaca	fuscata	Japanese Macaque	4.25862	Christopher Drake	http://www.flickr.com/photos/csd619/3386667066/
Macaca	nigra	Crested Macaque	4.72414	Jérôme Micheletta	http://www.flickr.com/photos/jmicheletta/4382759534/in/photostream/
Macaca	silenus	Lion-tailed Macaque	4.06552	Babujayan	http://commons.wikimedia.org/wiki/File:Lion-tailed_macaque.jpg
Macaca	sylvanus	Barbary Macaque	3.89655	Alan Hill	http://www.flickr.com/photos/alanhill/1572852662/in/photostream/
Macaca	sylvanus*	Barbary Macaque	3.95862	N Borman	http://www.flickr.com/photos/bernard14/5625453374/
Macaca	tonkeana	Tonkean Macaque	4.4069	Noel Rowe	Rowe, N. 1996: The Pictorial Guide to the Living Primates. Pogonias Press, East Hampton, NY. 263 pp.
Mandrillus	leucophaeus	Drill	5.08966	Thomas Kost	http://www.flickr.com/photos/toast322/3915713024/in/photostream/
Mandrillus	sphinx	Mandrill	3.92069	Robby Heischman	http://robbobert.deviantart.com/art/Mandrill-6313-196837620
Microcebus	rufus	Rufous Mouse Lemur	3.41379	Frank Vassen	http://commons.wikimedia.org/wiki/File:Brown_Mouse_Lemur,_Nosy_Mangabe,_Madagascar_2.jpg
Miopithecus	ogouensis	Northern Talapoin Monkey	3.81379	Milan Kaftan	not online, but see Figure 1
Mirza	zaza	Northern Giant Mouse Lemur	2.93103	D. Haring/DLC	Mittermeier, R.A.; Louis, E.E.; Richardson, M.; Schwitzer, C.; Langrand, O.; Rylands, A.B.; Hawkins, F.; Rajaobelina, S.; Ratsimbazafy, J.; Rasoloarison, R.; Roos, Ch.; Kappeler, P.M. & Mackinnon, J. (2010). Lemurs of Madagascar. Illustrated by S.D. Nash (3rd ed.). Conservation International. ISBN 978-1-934151-23-5.
Nasalis	larvatus	Proboscis Monkey	5.38966	Luis	http://www.flickr.com/photos/plantnerd/4950717747/in/photostream/
Nomascus	leucogenys	Northern White-cheeked Crested Gibbon	3.62414	linda	http://www.flickr.com/photos/jinterwas/3867619406/
Nomascus	leucogenys*	Northern White-cheeked Crested Gibbon	3.51379	StarlightHope	http://www.flickr.com/photos/starlighthope/6123446672/
Nycticebus	bengalensis	Bengal Slow Loris	3.32414	Helena Snyder	http://commons.wikimedia.org/wiki/File:Captive_N._bengalensis_from_Laos_with_6-week_baby.JPG
Oreonax	flavicauda	Peruvian Yellow-tailed Woolly Monkey	3.91379	A. Young	Rowe, N. 1996: The Pictorial Guide to the Living Primates. Pogonias Press, East Hampton, NY. 263 pp.
Otolemur	crassicaudatus	Thick-tailed Greater Galago	3.3069	Lisa de Vreede	http://www.flickr.com/photos/ldevreeede/3680009008/
Pan	paniscus	Bonobo	2.8931	Lolamon	http://www.flickr.com/photos/lolamon/6277939232/
Pan	troglodytes	Chimpanzee	3.35517	Amy Atherton	http://www.flickr.com/photos/chimp_amy/4989408775/in/set-72157612254094931
Papio	hamadryas	Hamadryas Baboon	4.70345	Aiwok	http://commons.wikimedia.org/wiki/File:Papio_hamadryas_m1.JPG
Perodicticus	potto	West African Potto	3.23793	Cincinnati Zoo / Dave Jenike	http://www.flickr.com/photos/cincinnatizoo/5324201245/
Piliocolobus	badius	Upper Guinea Red Colobus	4.54483	Edgar Thissen	http://www.flickr.com/photos/pg-photography/4926551434/in/set-72157603997597815/
Piliocolobus	kirkii	Zanzibar Red Colobus	3.58621	Olivier Lejade	http://commons.wikimedia.org/wiki/File:Red_Colobus_3.jpg
Pithecia	pithecia	White-faced Saki	4.88966	Hans Hillewaert	http://commons.wikimedia.org/wiki/File:Pithecia_pithecia.jpg?uselang=en-gb
Pongo	abelii	Sumatran Orangutan	4.97241	Aiwok	http://commons.wikimedia.org/wiki/File:Pongo_abelii_m2.JPG
Pongo	pygmaeus	Bornean Orangutan	5.20345	Noel Rowe	Rowe, N. 1996: The Pictorial Guide to the Living Primates. Pogonias Press, East Hampton, NY. 263 pp.
Trachypithecus	obscurus	Dusky Langur	4.15172	kh1234567890	http://www.flickr.com/photos/kh1234567890/5515341718/
Presbytis	thomasi	Thomas's Langur	3.74828	Dr. Arthur Anker	http://www.flickr.com/photos/artour_a/6633545919/in/photostream/
Prolemur	simus	Greater Bamboo Lemur	3.90345	Alan Hill	http://www.flickr.com/photos/alanhill/5126039151/
Propithecus	candidus	Silky Sifaka	3.5	Jeff Gibbs	http://commons.wikimedia.org/wiki/File:Propithecus_candidus_002.jpg
Propithecus	coronatus	Crowned Sifaka	4.56552	Alan Hill	http://www.flickr.com/photos/alanhill/1572857488/
Propithecus	tattersalli	Tattersall's Sifaka	3.48276	Anthony Brewer	http://www.flickr.com/photos/8775570@N08/4076689154/
Propithecus	verreauxi	Verreaux's Sifaka	3.14138	Jon Irvine	http://www.flickr.com/photos/calidris-photos/6539885069/in/set-72157628487195095
Pygathrix	nemaeus	Red-shanked Douc	3.66897	Art G.	http://www.flickr.com/photos/44237541@N00/1153845696
Rhinopithecus	roxellana	Golden Snub-nosed Monkey	3.67931	一鸣 朱	http://www.flickr.com/photos/30027012@N04/5046374939/
Saguinus	geoffroyi	Geoffroy's Tamarin	4.64483	Joe McKenna	http://www.flickr.com/photos/jpmckenna/4173963889/
Saguinus	imperator	Emperor Tamarin	3.3	Brocken Inaglory	http://commons.wikimedia.org/wiki/File:Emperor_Tamarin_portrait_2_edit1.jpg
Saguinus	imperator*	Emperor Tamarin	3.20345	Dean Thorpe	http://www.flickr.com/photos/aspexdesign/5693566782/
Saguinus	midas	Midas Tamarin	3.27241	Ryan Weishalla	http://www.flickr.com/photos/ilgopher/3432221834/in/photostream/
Saguinus	oedipus	Cotton-top Tamarin	3.84483	Ltshears	http://commons.wikimedia.org/wiki/File:Cottontop_Tamarin_12.jpg
Saimiri	sciureus	Guianan Squirrel Monkey	3.00345	Braboowi	http://commons.wikimedia.org/wiki/File:Squirrelmonkey01.jpg
Saimiri	sciureus*	Guianan Squirrel Monkey	3.40345	Ernst Vikne	http://www.flickr.com/photos/iboy/3676353564/
Semnopithecus	dussumieri	Southern Plains Gray Langur	3.31724	Sridhar Parthasarathy	http://www.flickr.com/photos/sridhu/2941364933/
Symphalangus	syndactylus	Siamang	3.68621	David Hegarty	http://www.flickr.com/photos/hegarty_david/3390217876/
Tarsius	syrichta	Philippine Tarsier	3.72759	Milada Řeháková-Petrů	not online, but see Figure 1
Tarsius	syrichta*	Philippine Tarsier	4.10345	Milada Řeháková-Petrů	not online
Theropithecus	gelada	Gelada	4.54483	Alan Hill	http://www.flickr.com/photos/alanhill/3033194186/in/photostream/
Trachypithecus	auratus (black morph)	East Javan Langur	3.84828	Bart Willems	http://www.flickr.com/photos/diddlbiker/2959734233/in/photostream/
Trachypithecus	auratus (orange morph)	East Javan Langur	2.98276	hjhipster	http://www.flickr.com/photos/albertovo5/4242904605/
Trachypithecus	auratus (orange morph)*	East Javan Langur	3.66552	Arjan Haverkamp	http://www.flickr.com/photos/ajhaverkamp/4636609674/
Trachypithecus	francoisi	Francois's Langur	3.47241	Alan Hill	http://www.flickr.com/photos/alanhill/3856685699/
Trachypithecus	pileatus	Capped Langur	3.84483	Vijay Anand Ismavel	http://www.flickr.com/photos/ivijayanand/6689719499/
Varecia	rubra	Red Ruffed Lemur	3.22414	Laura	http://www.flickr.com/photos/flickrchimera/4127542950/in/photostream
Varecia	variegata	Black-and-white Ruffed Lemur	2.3931	Edgar Thissen	http://www.flickr.com/photos/pg-photography/2381653103/in/photostream/
References: Groves, C.P. & Chhangani, A. 2008. Semnopithecus dussumieri. The IUCN Red List of Threatened Species 2008: e.T39835A10274796. http://dx.doi.org/10.2305/IUCN.UK.2008.RLTS.T39835A10274796.en. Downloaded on 11 September 2016. Mittermeier, R. A., Rylands, A. B., & Wilson, D. E. (2013). Handbook of the Mammals of the World - Volume 3. Barcelona: Lynx edicions, pp. 952 Shekelle, M. & Arbole…
